# Supplementary material
Source: PubMed Central journal article supplement (PMC8377611)
Supplement: NIHMS1733152-supplement-appendix.pdf [file NIHMS1733152-supplement-appendix.pdf]

## Supplementary Appendix

This appendix has been provided by the authors to give readers additional information about their work.

Supplement to: Sehn LH, Salles G. Diffuse large B-cell lymphoma. *N Engl J Med* 2021;384:842-58. DOI: 10.1056/NEJMra2027612

# Supplementary Appendix

## Table of Contents

|                                                                                                    |        |
|----------------------------------------------------------------------------------------------------|--------|
| 1. Supplementary Table S1: Ann Arbor Staging.....                                                  | page 2 |
| 2. Supplementary Table S2: Lugano Classification Response Criteria .....                           | page 3 |
| 3. Supplementary Table S3: The Deauville Five-Point Scale.....                                     | page 4 |
| 4. Supplementary Table S4: Select Recent Trials in Untreated Diffuse Large B-Cell<br>Lymphoma..... | page 5 |
| 5. Supplementary references.....                                                                   | page 7 |

## **Supplementary Table S1 : The Ann Arbor Staging**<sup>1,2</sup>

| <b>Stage</b>                                                                     | <b>Description</b>                                                                                                                                          |
|----------------------------------------------------------------------------------|-------------------------------------------------------------------------------------------------------------------------------------------------------------|
| I                                                                                | Involvement of a single lymph node region (eg. cervical, axillary, inguinal, mediastinal) or lymphoid structure such as spleen, thymus, and Waldeyer's Ring |
| II                                                                               | Involvement of two or more lymph node regions or lymph node structures on the same side of the diaphragm                                                    |
| III                                                                              | Involvement of lymph node regions or lymphoid structures on both sides of the diaphragm                                                                     |
| IV                                                                               | Additional noncontiguous extranodal involvement                                                                                                             |
| <b>Additional note</b>                                                           |                                                                                                                                                             |
| “E” designates limited direct extension to an extranodal site for stage I to III |                                                                                                                                                             |
| “X” designates presence of bulky disease                                         |                                                                                                                                                             |

Of note, the definition of bulky disease “X” has been variable over time and studies, with sizes ranging from 6 cm to 10 cm. Recent recommendation (Cheson, B et al. J Clin Oncol 2014; 32:3059-68) suggests omitting the use of this term and recording the largest size of the tumor.

The presence or absence of systemic symptoms (B-symptoms) has been used to complete this staging classification as “A” (absence) or “B” (presence). However, given the lack of independent prognostic significance, it has been recently suggested that recording of B-symptoms is no longer mandatory for patients with non-Hodgkin lymphoma (Cheson, B et al. J Clin Oncol 2014; 32:3059-68) and can be reserved for patients with Hodgkin lymphoma.

B-Symptoms include the presence of one or more of the following:

- Unexplained weight loss of more than 10% of the body weight during the 6 months before initial staging investigation
- Unexplained persistent or recurrent fever with temperatures above 38 C during the previous month
- Recurrent drenching night sweats during the previous month

**Supplementary Table S2: Lugano Classification Response Criteria**<sup>2,3</sup>

| Response assessment        | PET – CT                             |                                                                                  | CT based                                                                                                                                                                                                                                        |
|----------------------------|--------------------------------------|----------------------------------------------------------------------------------|-------------------------------------------------------------------------------------------------------------------------------------------------------------------------------------------------------------------------------------------------|
| <b>Complete</b>            | <b>Complete metabolic response</b>   |                                                                                  | <b>Complete radiologic response</b>                                                                                                                                                                                                             |
|                            | Tumor lesions                        | Score 1,2 or probably 3 on the Deauville scale                                   | All target lesions regress to ≤1.5 cm in their longest transverse diameter                                                                                                                                                                      |
|                            | Bone marrow                          | Lack of FDG uptake                                                               | Absence of pathological involvement of the biopsy by morphology and immunohistochemistry                                                                                                                                                        |
| <b>Partial</b>             | <b>Partial metabolic response</b>    |                                                                                  | <b>Partial radiologic response</b>                                                                                                                                                                                                              |
|                            | Tumor lesions                        | Score 4 or 5 with reduced uptake compared to baseline                            | Reduction by ≥50% of the size (SPD) of the lesions (consider the SPD of up to 6 target lesions)                                                                                                                                                 |
|                            | Bone marrow                          | Residual uptake reduced from baseline                                            | Not applicable                                                                                                                                                                                                                                  |
| <b>Stable disease</b>      | <b>No metabolic response</b>         |                                                                                  | <b>Stable disease</b>                                                                                                                                                                                                                           |
|                            | Tumor lesions                        | Score 4 or 5 without significant change from baseline                            | Reduction by <50% or increase by <50% of the size (SPD) of the lesions (consider the SPD of up to 6 target lesions)                                                                                                                             |
|                            | Bone marrow                          | No change from baseline                                                          | Not applicable                                                                                                                                                                                                                                  |
| <b>Progressive disease</b> | <b>Progressive metabolic disease</b> |                                                                                  | <b>Progressive disease</b>                                                                                                                                                                                                                      |
|                            | Tumor lesions                        | Score 4 or 5 with increase in intensity from baseline and/or new FDG-avid lesion | Increase of nodal or extranodal lesions by ≥50% of the product of the longest transverse diameter and its perpendicular diameters from nadir <sup>¶</sup> , or appearance of new nodal lesions >1.5 cm (1 cm for unequivocal extranodal lesion) |
|                            | Bone marrow                          | New or recurrent FDG-avid foci                                                   | New or recurrent involvement                                                                                                                                                                                                                    |

Abbreviations: SPD=sum of the product of the perpendicular diameters of the lesion

\* In clinical trials, interpretation of a score of 3 observed at interim PET depends on the treatment plan.

<sup>¶</sup> the increase of nodal or extranodal lesions by ≥50% of the product of the longest transverse diameter and its perpendicular diameters should be accompanied by an increase from nadir of the longest diameter by at least 0.5 cm for lesions ≤ 2 cm and 1 cm for lesions > 2 cm

**Supplementary Table S3: The Deauville Five-Point Scale**<sup>3</sup>

| <b>Deauville Score</b> | <b>18-FDG PET findings</b>                             |
|------------------------|--------------------------------------------------------|
| 1                      | No uptake                                              |
| 2                      | Uptake $\leq$ mediastinum                              |
| 3                      | Uptake $>$ mediastinum but $\leq$ liver                |
| 4                      | Uptake moderately higher than liver                    |
| 5                      | Uptake markedly higher than liver and/or new lesions   |
| X                      | New areas of uptake unlikely to be related to lymphoma |

The use of this scale is recommended for reporting response assessment by PET-CT at the end of treatment. The Deauville five-point scale scores the area of most intense 18-fluorodeoxyglucose (18-FDG) uptake in a site of initial disease, if present, as follows. Scores 1 and 2 represent complete metabolic response (CMR); score 3 also likely represents CMR in patients receiving standard treatment. Scores 4 and 5 with reduced 18-FDG uptake from baseline likely represents partial metabolic response, but at the end of treatment, corresponds to residual metabolic disease. A score of 5 with no change in 18-FDG uptake, increased 18-FDG uptake, or new sites of 18-FDG uptake in keeping with lymphoma represents treatment failure and/or progression. Treatment-related inflammation, intercurrent infection or underlying concomitant inflammatory disease may result in non-specific 18-FDG uptake. PET-CT results should be interpreted in the overall clinical context, including anticipated prognosis and other markers of response.

**Supplementary Table S4: Select Recent Trials in Untreated Diffuse Large B-Cell Lymphoma**

| Treatment Regimen             | Phase | Eligibility                                                                 | N    | Outcome                                   | p-value        | Reference                                         |
|-------------------------------|-------|-----------------------------------------------------------------------------|------|-------------------------------------------|----------------|---------------------------------------------------|
| <b>Advanced-Stage</b>         |       |                                                                             |      |                                           |                |                                                   |
| R-ACVBP vs R-CHOP             | 3     | Age 18-59 y; aaIPI=1                                                        | 380  | 3-y PFS 87% vs 73%<br>3-y OS 92% vs 84%   | 0.002<br>0.007 | Recher et al. <sup>4</sup>                        |
| R-CHOP-14 vs R-CHOP-21        | 3     | Age ≥18 y; stage IA bulky (>10cm)/IB -IV                                    | 1080 | 2-y PFS 75% vs 75%<br>2-y OS 83% vs 81%   | NS<br>NS       | Cunningham et al. <sup>5</sup>                    |
| R-CHOP-14 vs R-CHOP-21        | 3     | Age 60-80 y; aaIPI≥1                                                        | 602  | 3-y EFS 56% vs 60%<br>3-y OS 69% vs 72%   | NS<br>NS       | Delarue et al. <sup>6</sup>                       |
| R-megaCHOEP vs R-CHOEP-14     | 3     | Age 18-60 y; aaIPI=2-3                                                      | 275  | 3-y EFS 61% vs 70%<br>3-y OS 77% vs 85%   | NS<br>NS       | Schmitz et al. <sup>7</sup>                       |
| R-CHOP + ASCT vs R-CHOP       | 3     | Age 15-65 y; aaIPI=2-3                                                      | 370  | 2-y PFS 69% vs 55%<br>2-y OS 74% vs 71%   | 0.005<br>NS    | Stiff et al. <sup>8</sup>                         |
| R-HDS + ASCT vs R-CHOP-14     | 3     | Age 18-65 y; stage II bulky (>10cm)-IV; aaIPI=2-3 or IPI 3-5                | 246  | 3-y EFS 65% vs 62%<br>3-y OS 77% vs 74%   | NS<br>NS       | Cortelazzo et al. <sup>9</sup>                    |
| DA-EPOCH-R vs R-CHOP          | 3     | Age ≥18 y; stage II-IV                                                      | 491  | 2-y PFS 79% vs 76%<br>2-y OS 87% vs 86%   | NS<br>NS       | Bartlett et al. <sup>10</sup>                     |
| Obinutuzumab-CHOP vs R-CHOP   | 3     | Age ≥18 y; aaIPI≥2, or IPI=1 and age ≤60y, or IPI=0 and bulky (≥7.5 cm)     | 1418 | 3-y PFS 70% vs 67%<br>3-y OS 81% vs 81%   | NS<br>NS       | Vitolo et al. <sup>11</sup><br>(GOYA trial)       |
| Bortezomib-R-CHOP vs R-CHOP   | 2     | Age ≥18 y; non-GCB subtype by Hans IHC algorithm                            | 206  | 2-y PFS 82% vs 78%<br>2-y OS 93% vs 88%   | NS<br>NS       | Leonard et al. <sup>12</sup><br>(Pyramid trial)   |
| Bortezomib-R-CHOP vs R-CHOP   | 3     | Age ≥18 y; stage I bulky (>10cm)-IV; sufficient diagnostic material for GEP | 918  | 30-m PFS 74% vs 70%<br>30-m OS 83% vs 82% | NS<br>NS       | Davies et al. <sup>13</sup><br>(REMoDL-B trial)   |
| Ibrutinib-R-CHOP vs R-CHOP    | 3     | Age ≥18 y; non-GCB subtype by Hans IHC algorithm; stage II-IV; R-IPI≥1      | 838  | 3-y EFS 70% vs 67%<br>3-y OS 83% vs 81%   | NS<br>NS       | Younes et al. <sup>14</sup><br>(PHOENIX trial)    |
| Lenalidomide-R-CHOP vs R-CHOP | 2     | Age ≥18 y; stage II bulky (>10cm)-IV; IPI≥2                                 | 349  | 3-y PFS 73% vs 61%<br>3-y OS 83% vs 75%   | 0.03<br>0.05   | Nowakowski et al. <sup>15</sup>                   |
| Lenalidomide-R-CHOP vs R-CHOP | 3     | Age ≥18 y; stage II-IV; IPI≥2; ABC subtype by GEP NanoString                | 570  | 2-y PFS 67% vs 64%<br>2-y OS 79% vs 80%   | NS<br>NS       | Nowakowski et al. <sup>16</sup><br>(ROBUST trial) |

| Limited-Stage                                                                         |      |                                                     |     |                                                       |          |                                                |
|---------------------------------------------------------------------------------------|------|-----------------------------------------------------|-----|-------------------------------------------------------|----------|------------------------------------------------|
| R-CHOPx3 + XRT                                                                        | 2    | Stage I-nonbulky stage 2 (<10cm); Sm-IPI $\geq$ 1   | 60  | 4-y PFS 88%<br>4-y OS 92%                             | -        | Persky et al. <sup>17</sup>                    |
| R-CHOPx4 + 2R <i>vs</i><br>R-CHOPx6                                                   | 3    | Age 18-60 y; stage I-II; nonbulky (<7.5cm); aaIPI=0 | 588 | 3-y PFS 96% <i>vs</i> 94%<br>3-y OS 99% <i>vs</i> 98% | NS<br>NS | Poeschel et al. <sup>18</sup><br>(FLYER trial) |
| PET-guided:<br>R-CHOPx4-6 + XRT <i>vs</i><br>R-CHOPx4-6                               | 3    | Age 18-75 y; stage I-II; nonbulky (<7.0cm)          | 334 | 5-y EFS 92% <i>vs</i> 89%<br>3-y OS 96% <i>vs</i> 92% | NS<br>NS | Lamy et al. <sup>19</sup>                      |
| PET-guided:<br>PET <sup>+</sup> : R-CHOPx3 + XRT + RIT<br>PET <sup>-</sup> : R-CHOPx4 | 2    | Stage I-II nonbulky (<10cm)                         | 132 | 5-y PFS 86%; OS 85%<br>5-y PFS 89%; OS 91%            | -        | Persky et al. <sup>20</sup>                    |
| PET-guided:<br>PET <sup>+</sup> : R-CHOPx3 + XRT<br>PET <sup>-</sup> : R-CHOPx4       | N/A* | Stage I-II nonbulky (<10cm); no B-symptoms          | 319 | 5-y TTP 80%; OS 77%<br>5-y TTP 92%; OS 89%            | -        | Sehn et al. <sup>21</sup>                      |

**Legend to Supplementary Table 4:** Results from select recent clinical trials in patients with untreated advanced-stage and limited-stage DLBCL, including novel immunochemotherapy combinations, the addition of novel agents to standard R-CHOP, and the use of PET-guided approaches. \*population-based analysis

**Abbreviations:** n, number; aaIPI, age-adjusted International Prognostic Index; R-ACVBP, rituximab, doxorubicin, cyclophosphamide, vindesine, bleomycin, prednisone, methotrexate consolidation; R-CHOP, rituximab, cyclophosphamide, doxorubicin, vincristine, prednisone; PFS, progression-free survival; OS, overall survival; R-CHOP14, R-CHOP administered every 14 days; R-CHOP21, standard dose R-CHOP administered every 21 days; EFS, event-free survival; R-CHOEP-14; R-CHOP-14 + etoposide; R-MegaCHOEP, dose-escalated sequential high dose therapy +ASCT, autologous stem cell transplant; R-HDS, rituximab with high dose sequential chemotherapy; DA-EPOCH-R, dose-adjusted etoposide, prednisone, vincristine, cyclophosphamide, doxorubicin, rituximab; IHC, immunohistochemistry; GEP, gene-expression profiling; R-IPI, revised-International Prognostic Index; Sm-IPI, stage-modified International Prognostic Index; XRT, radiation therapy; RIT, radioimmunotherapy (ibritumomab); PET<sup>+</sup>, PET-positive; PET<sup>-</sup>, PET-negative; TTP, time-to-progression.

## References in the Supplementary Appendix

1. Lister TA, Crowther D, Sutcliffe SB, et al: Report of a committee convened to discuss the evaluation and staging of patients with Hodgkin's disease: Cotswolds Meeting. *J Clin Oncol* 1989; 7:1630- 1636.
2. Cheson BD, Fisher RI, Barrington SF, et al. Recommendations for initial evaluation, staging, and response assessment of Hodgkin and non-Hodgkin lymphoma: the Lugano classification. *J Clin Oncol* 2014; 32:3059-3068.
3. Barrington SF, Mikhaeel NG, Kostakoglu L, et al. Role of imaging in the staging and response assessment of lymphoma: consensus of the International Conference on Malignant Lymphomas Imaging Working Group. *J Clin Oncol* 2014; 32:3048-3058 ; [published correction appears in *J Clin Oncol* 2016; 34:2562].
4. Recher C, Coiffier B, Haioun C, et al. Intensified chemotherapy with ACVBP plus rituximab versus standard CHOP plus rituximab for the treatment of diffuse large B-cell lymphoma (LNH03-2B): an open-label randomised phase 3 trial. *Lancet* 2011;378:1858-67.
5. Cunningham D, Hawkes EA, Jack A, et al. Rituximab plus cyclophosphamide, doxorubicin, vincristine, and prednisolone in patients with newly diagnosed diffuse large B-cell non-Hodgkin lymphoma: a phase 3 comparison of dose intensification with 14-day versus 21-day cycles. *Lancet* 2013;381:1817-26.
6. Delarue R, Tilly H, Mounier N, et al. Dose-dense rituximab-CHOP compared with standard rituximab-CHOP in elderly patients with diffuse large B-cell lymphoma (the LNH03-6B study): a randomised phase 3 trial. *Lancet Oncol* 2013;14:525-33.
7. Schmitz N, Nickelsen M, Ziepert M, et al. Conventional chemotherapy (CHOEP-14) with rituximab or high-dose chemotherapy (MegaCHOEP) with rituximab for young, high-risk patients with aggressive B-cell lymphoma: an open-label, randomised, phase 3 trial (DSHNHL 2002-1). *Lancet Oncol* 2012;13:1250-9.
8. Stiff PJ, Unger JM, Cook JR, et al. Autologous transplantation as consolidation for aggressive non-Hodgkin's lymphoma. *N Engl J Med* 2013;369:1681-90.
9. Cortelazzo S, Tarella C, Gianni AM, et al. Randomized Trial Comparing R-CHOP Versus High-Dose Sequential Chemotherapy in High-Risk Patients With Diffuse Large B-Cell Lymphomas. *J Clin Oncol* 2016;34:4015-22.
10. Bartlett NL, Wilson WH, Jung SH, et al. Dose-Adjusted EPOCH-R Compared With R-CHOP as Frontline Therapy for Diffuse Large B-Cell Lymphoma: Clinical Outcomes of the Phase III Intergroup Trial Alliance/CALGB 50303. *J Clin Oncol* 2019;37:1790-9.
11. Vitolo U, Trneny M, Belada D, et al. Obinutuzumab or Rituximab Plus Cyclophosphamide, Doxorubicin, Vincristine, and Prednisone in Previously Untreated Diffuse Large B-Cell Lymphoma. *J Clin Oncol* 2017;35:3529-37.
12. Leonard JP, Kolibaba KS, Reeves JA, et al. Randomized Phase II Study of R-CHOP With or Without Bortezomib in Previously Untreated Patients With Non-Germinal Center B-Cell-Like Diffuse Large B-Cell Lymphoma. *J Clin Oncol* 2017;35:3538-46.



13. Davies A, Cummin TE, Barrans S, et al. Gene-expression profiling of bortezomib added to standard chemoimmunotherapy for diffuse large B-cell lymphoma (REMoDL-B): an open-label, randomised, phase 3 trial. *Lancet Oncol* 2019;20:649-62.
14. Younes A, Sehn LH, Johnson P, et al. Randomized Phase III Trial of Ibrutinib and Rituximab Plus Cyclophosphamide, Doxorubicin, Vincristine, and Prednisone in Non-Germinal Center B-Cell Diffuse Large B-Cell Lymphoma. *J Clin Oncol* 2019;37:1285-95.
15. Nowakowski GS, Hong F, Scott DW, et al. Addition of Lenalidomide to R-CHOP Improves Outcomes in Newly Diagnosed Diffuse Large B-Cell Lymphoma in a Randomized Phase II US Intergroup Study ECOG-ACRIN E1412. *J Clin Oncol* 2021, in press. Epub ahead of print. PMID: 3355594
16. Nowakowski GS, Chiappella A, Gascoyne RD, et al. ROBUST: A Phase III Study of Lenalidomide Plus R-CHOP versus Placebo Plus R-CHOP in Previously Untreated Patients With ABC-type Diffuse Large B-cell Lymphoma. *J Clin Oncol* 2021, in press.
17. Persky DO, Unger JM, Spier CM, et al. Phase II study of rituximab plus three cycles of CHOP and involved-field radiotherapy for patients with limited-stage aggressive B-cell lymphoma: Southwest Oncology Group study 0014. *J Clin Oncol* 2008;26:2258-63.
18. Poeschel V, Held G, Ziepert M, et al. Four versus six cycles of CHOP chemotherapy in combination with six applications of rituximab in patients with aggressive B-cell lymphoma with favourable prognosis (FLYER): a randomised, phase 3, non-inferiority trial. *Lancet* 2020;394:2271-81.
19. Lamy T, Damaj G, Soubeyran P, et al. R-CHOP 14 with or without radiotherapy in nonbulky limited-stage diffuse large B-cell lymphoma. *Blood* 2018;131:174-81.
20. Persky DO, Li H, Stephens DM, et al. Positron Emission Tomography-Directed Therapy for Patients With Limited-Stage Diffuse Large B-Cell Lymphoma: Results of Intergroup National Clinical Trials Network Study S1001. *J Clin Oncol* 2020, 10;38:3003-3011.
21. Sehn LH, Scott DW, Villa D, et al. Long-Term Follow-up of a PET-Guided Approach to Treatment of Limited-Stage Diffuse Large B-Cell Lymphoma (DLBCL) in British Columbia (BC). *Blood* 2019;134:abstract 401.
